# Supplementary material for: Influence of surface treatment on PEDOT coatings: surface and electrochemical corrosion aspects of newly developed Ti alloy
Source: Royal Society of Chemistry journal article supplement (doi:10.1039/c8ra01718b), 2018-01-01

**Influence of surface treatment on PEDOT coatings:**

**Surface and electrochemical corrosion aspects of newly developed Ti alloy**

**A.Madhan Kumar<sup>a\*</sup>, M.A.Hussein<sup>a</sup>, Akeem Yusuf Adesina<sup>b</sup>,**

**Suresh Ramakrishna<sup>c,d</sup> and N. Al-Aqeeli<sup>b</sup>**

<sup>a</sup>Centre of Research Excellence in Corrosion, Research Institute, King Fahd University of

Petroleum and Minerals, Dhahran, Saudi Arabia

<sup>b</sup>Department of Mechanical Engineering, King Fahd University of Petroleum and

Minerals, Dhahran 31261, Saudi Arabia

<sup>c</sup>Graduate School of Biomedical Science and Engineering,

Hanyang University, Seoul, South Korea

<sup>d</sup>College of Medicine, Hanyang University, Seoul, South Korea

**Figure S1 Schematic representation of contact angle measurement in static and dynamic mode.**

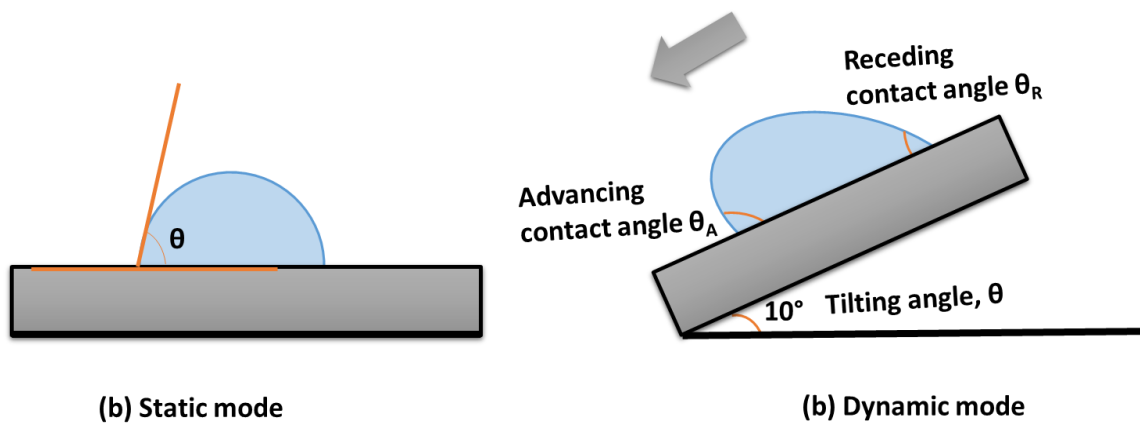

**Figure S2 EDS results of (a) Untreated TNZ (b) ST1 (c)ST2 and (d) ST3 TNZ substrates**

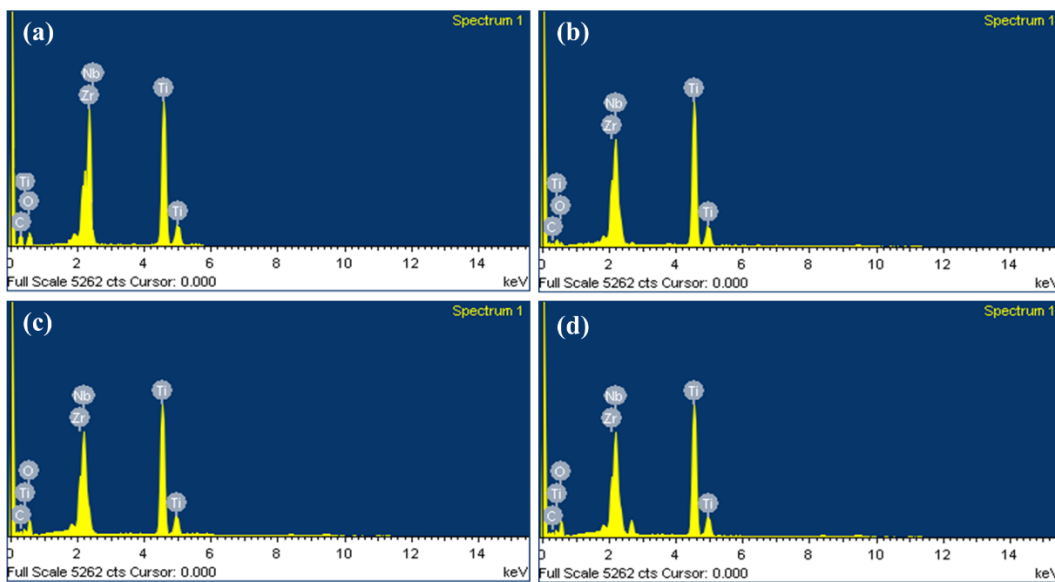

**Figure S3 Dynamic contact angle results of (a) Untreated TNZ (b) ST1 (c)ST2 and (d) ST3 TNZ substrates**

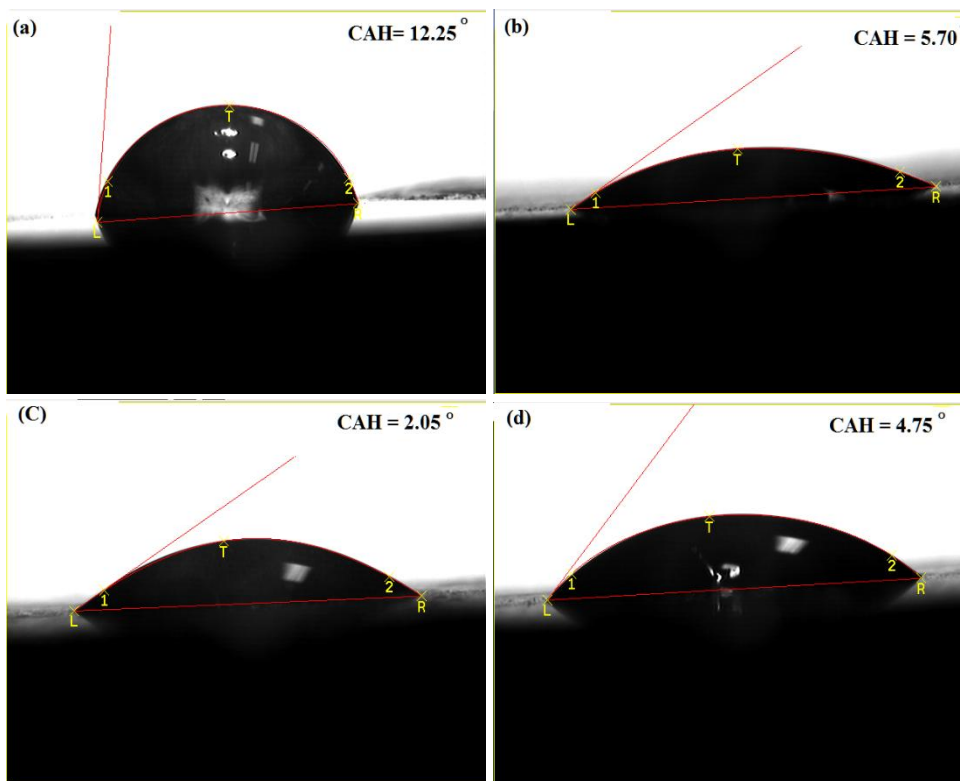

**Figure S4 EDS results of (a) PEDOT/UT (b) PEDOT/ST1 (c)PEDOT/ST2 and (d) PEDOT/ST3 TNZ substrates**

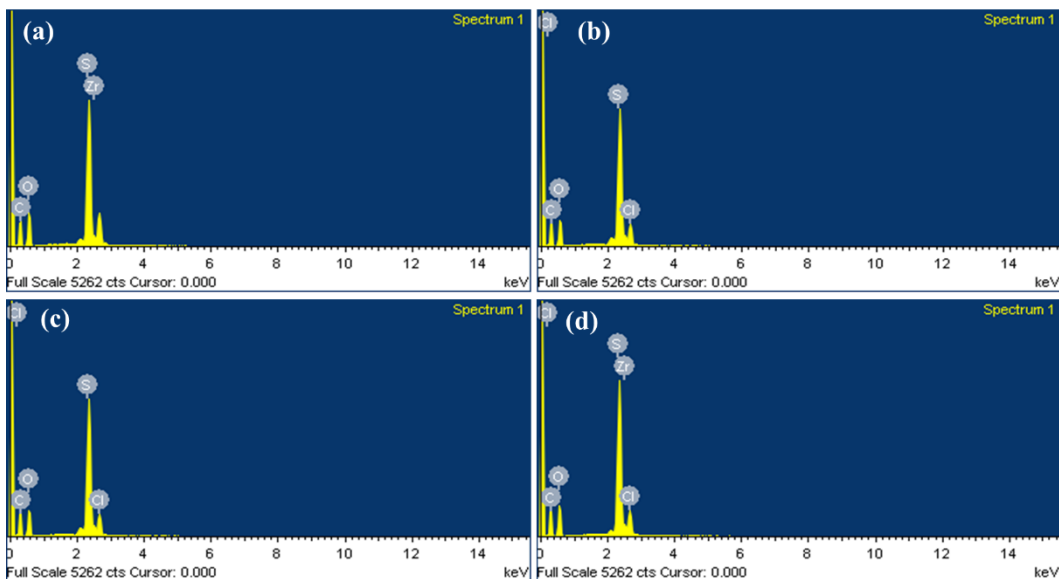

**Figure S5 LPR cures of uncoated and coated TNZ substrates**

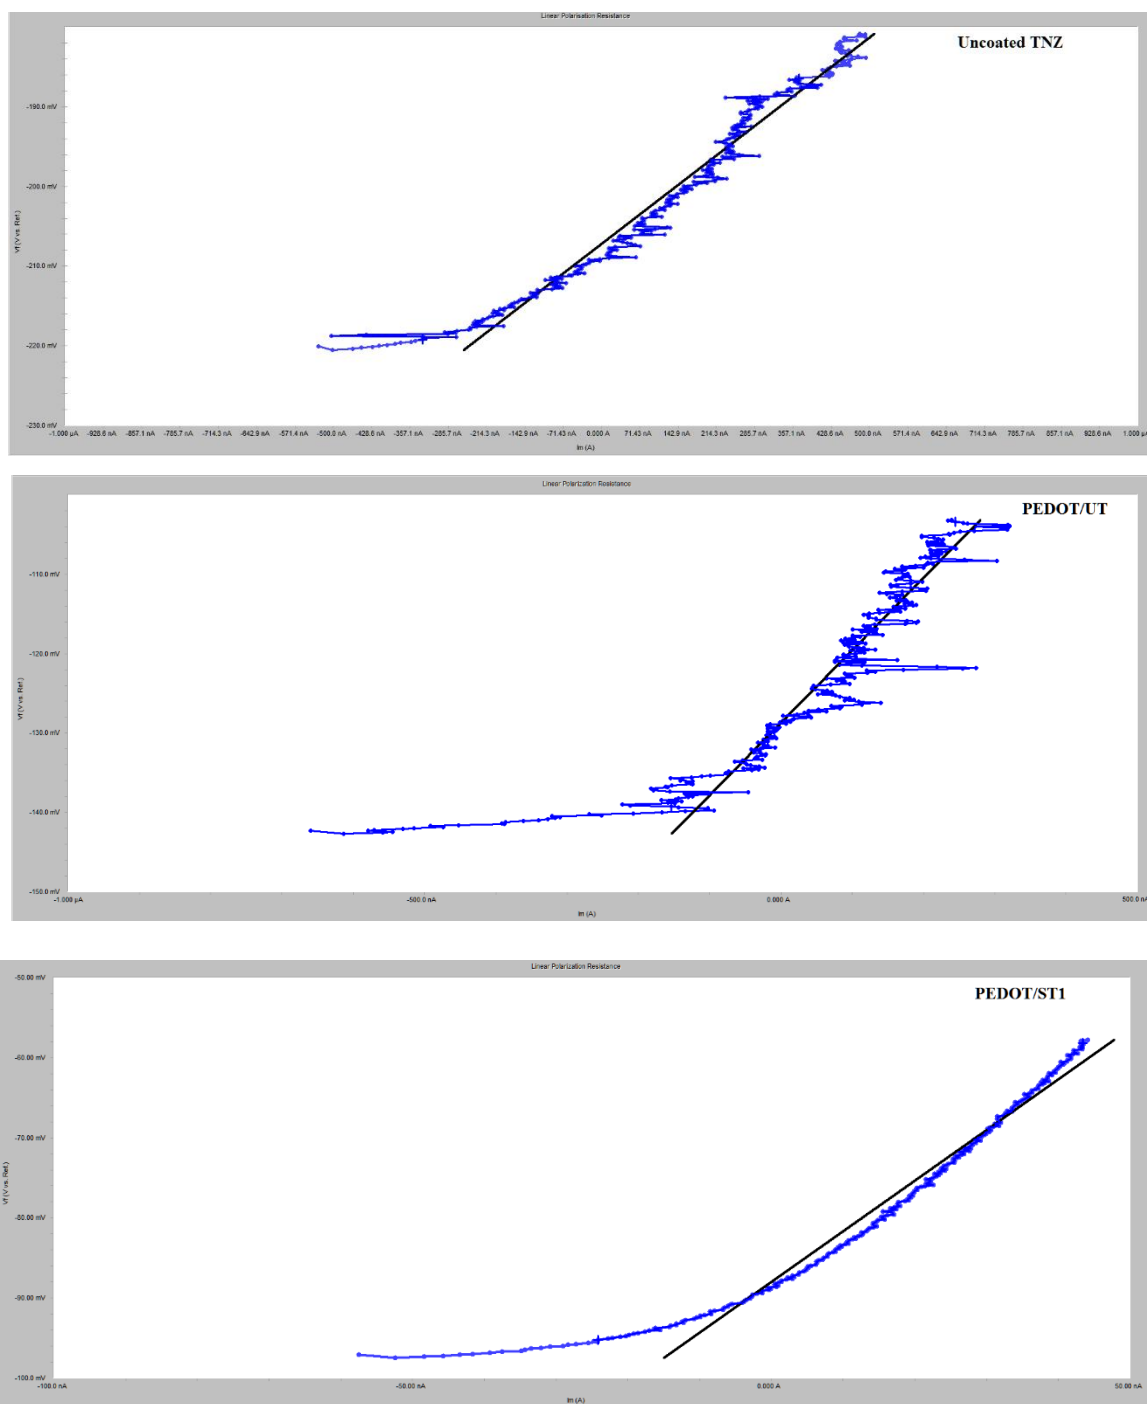

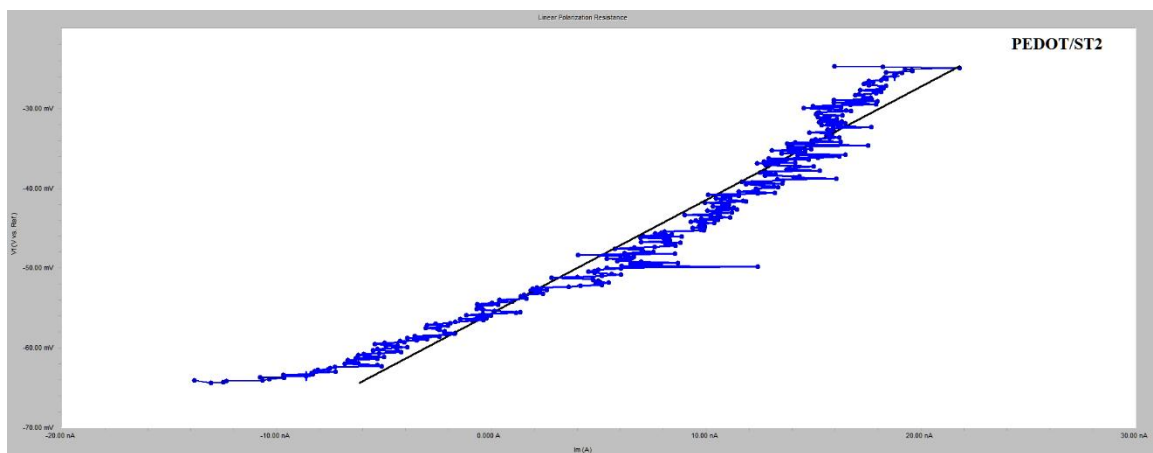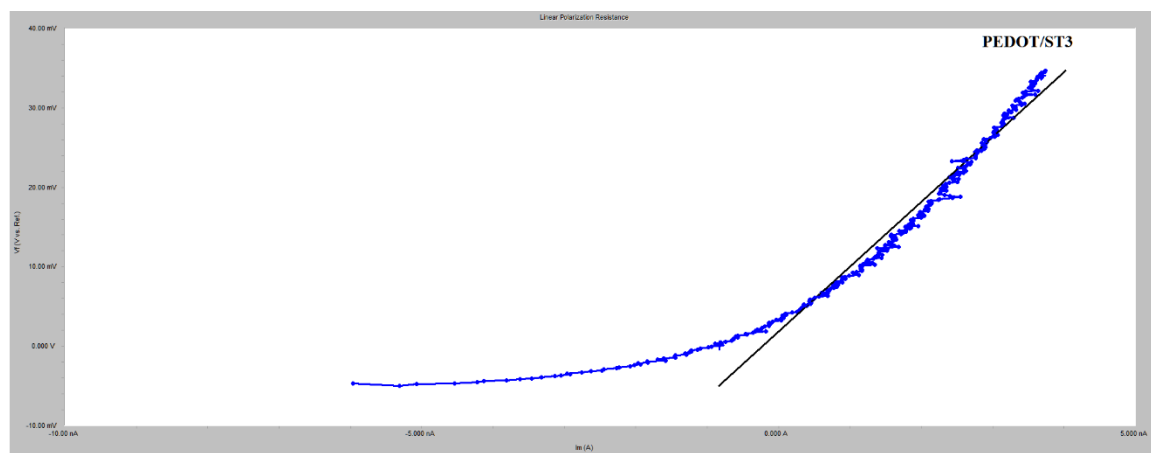

**Figure S6 EIS circuits of uncoated and coated TNZ substrates**

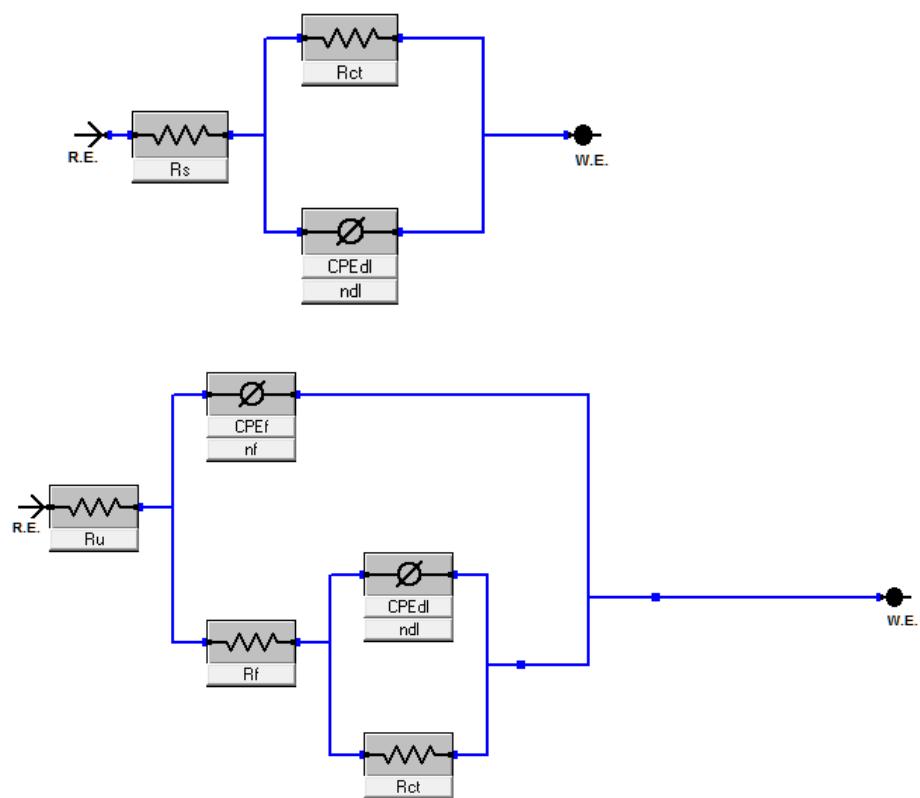

**Figure S7 In vitro MG63 osteoblast Cell culture studies of PEDOT coatings on ST2 and ST3 TNZ substrates**

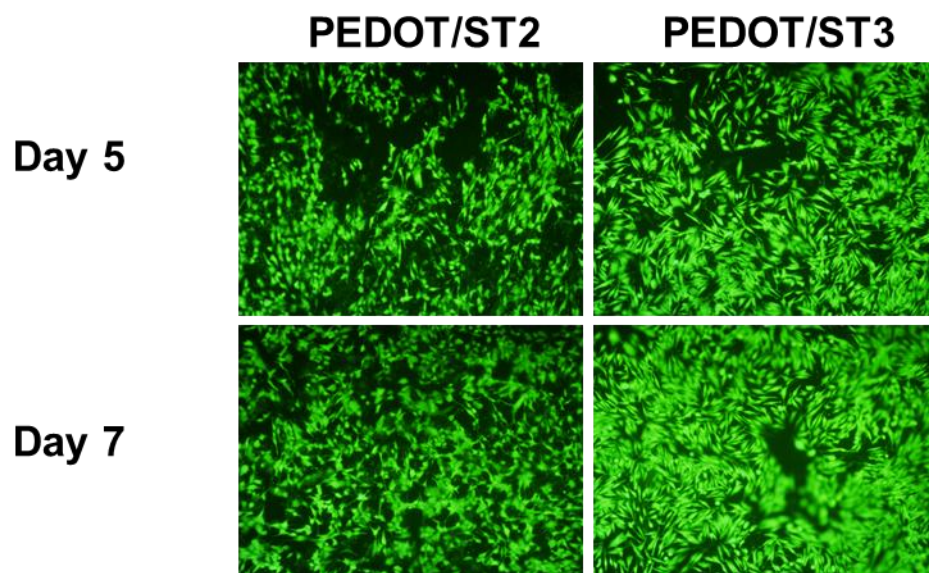

**Figure S8 Contact angle images of (a) PEDOT/UT (b) PEDOT/ST1 (c) PEDOT/ST2 and (d) PEDOT/ST3**

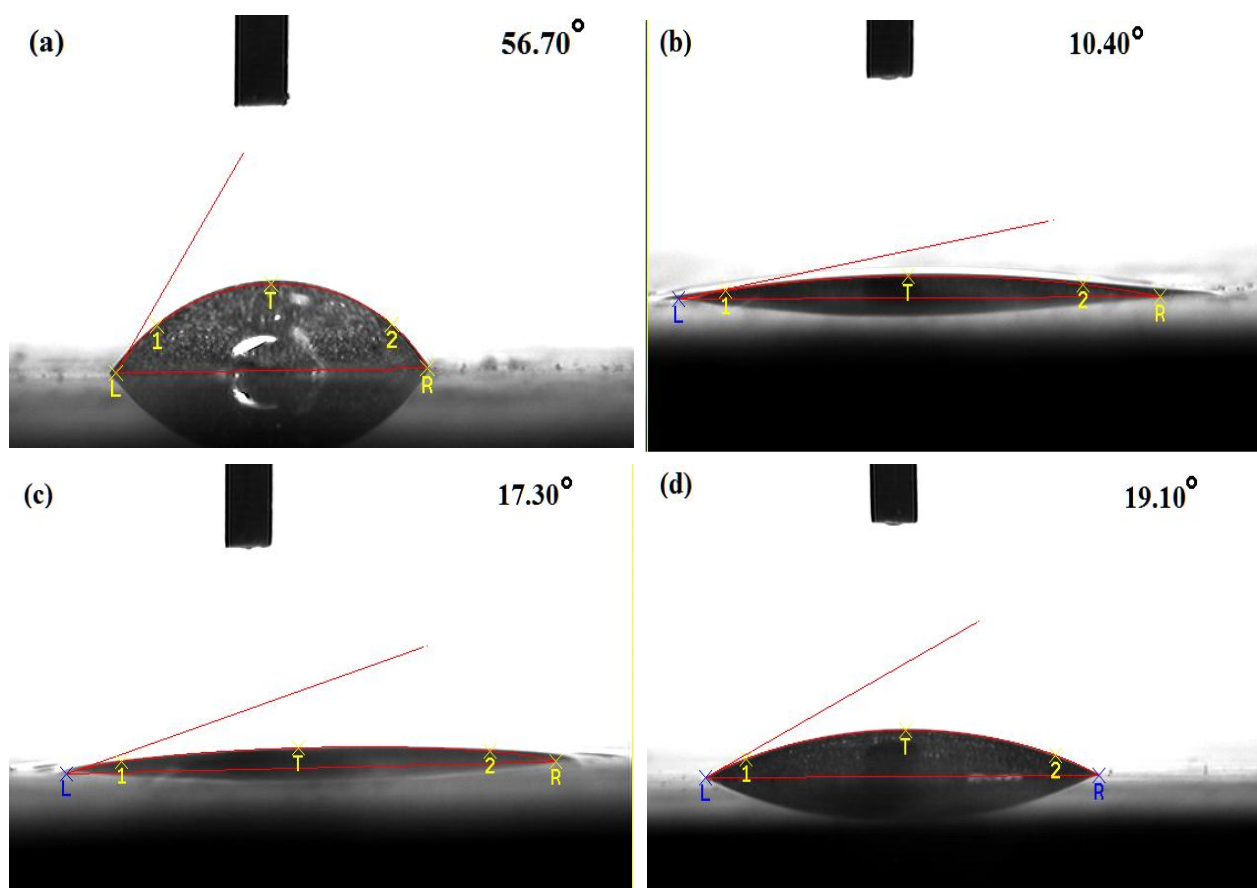

Supplement: c8ra01718b1.pdf [file c8ra01718b1.pdf]
